# Supplementary material
Source: HighWire-hosted journal article supplement (https://www.cmaj.ca/highwire/filestream/74759/field_highwire_adjunct_files/8/190757-res-5-at.pdf)
Supplement: 190757-res-5-at.pdf [file 190757-res-5-at.pdf]

**Appendix 5 (as supplied by the authors):** Prevalence and weights<sup>1</sup> for the extended version of the multimorbidity scores.

|                            | Prevalence <sup>2</sup> | Weight for consultations <sup>3</sup> | Weight for mortality <sup>4</sup> | Weight for emergency admissions <sup>4</sup> | General-outcome weight <sup>5</sup> |
|----------------------------|-------------------------|---------------------------------------|-----------------------------------|----------------------------------------------|-------------------------------------|
| Hypertension               | 19.24                   | 0.83                                  | -1.88                             | 11.29                                        | 0.09                                |
| Anxiety/Depression         | 12.85                   | 2.15                                  | 6.88                              | 44.33                                        | 0.47                                |
| Painful condition          | 11.63                   | 3.41                                  | 16.30                             | 82.13                                        | 0.87                                |
| Hearing loss               | 11.27                   | 0.96                                  | -3.72                             | 7.73                                         | 0.07                                |
| Irritable bowel syndrome   | 7.61                    | 1.71                                  | -0.77                             | 7.46                                         | 0.18                                |
| Asthma                     | 7.20                    | 1.34                                  | -2.45                             | 21.47                                        | 0.18                                |
| Diabetes                   | 6.58                    | 3.84                                  | 9.83                              | 53.95                                        | 0.71                                |
| Prostate disorders         | 6.31                    | 1.26                                  | -10.02                            | 5.13                                         | 0.01                                |
| Thyroid disorders          | 5.24                    | 0.93                                  | -0.83                             | 1.24                                         | 0.08                                |
| Coronary heart disease     | 4.79                    | 1.49                                  | 4.29                              | 68.05                                        | 0.46                                |
| Chronic kidney disease     | 4.50                    | 0.97                                  | 16.47                             | 51.24                                        | 0.51                                |
| Diverticular disease       | 3.24                    | 0.77                                  | -10.09                            | 9.60                                         | -0.02                               |
| Chronic sinusitis          | 2.96                    | 1.11                                  | -0.19                             | 4.88                                         | 0.13                                |
| Atrial fibrillation        | 2.72                    | 5.98                                  | 22.93                             | 105.78                                       | 1.30                                |
| Constipation               | 2.67                    | 3.16                                  | 34.58                             | 64.91                                        | 1.03                                |
| Stroke & TIA               | 2.55                    | 1.53                                  | 20.41                             | 88.15                                        | 0.77                                |
| COPD                       | 2.46                    | 3.40                                  | 42.29                             | 129.18                                       | 1.41                                |
| Connective tissue disorder | 2.33                    | 3.00                                  | 0.08                              | 27.45                                        | 0.40                                |
| Cancer                     | 2.15                    | 2.65                                  | 62.28                             | 103.69                                       | 1.50                                |
| Peptic ulcer disease       | 1.62                    | 0.53                                  | 5.69                              | 17.66                                        | 0.20                                |
| Alcohol problems           | 1.60                    | 0.81                                  | 11.42                             | 81.19                                        | 0.55                                |
| Substance misuse           | 1.19                    | 1.01                                  | 2.79                              | 61.41                                        | 0.38                                |
| Psoriasis or eczema        | 1.16                    | 1.88                                  | -1.46                             | 22.30                                        | 0.25                                |
| Blindness and low vision   | 1.08                    | 0.33                                  | 1.16                              | 24.38                                        | 0.15                                |
| Heart failure              | 1.04                    | 2.86                                  | 42.26                             | 70.44                                        | 1.12                                |
| Dementia                   | 1.02                    | 1.87                                  | 122.92                            | 158.14                                       | 2.46                                |

|                             |      |      |       |        |      |
|-----------------------------|------|------|-------|--------|------|
| Psychosis/bipolar disorder  | 0.98 | 2.22 | 6.64  | 71.24  | 0.58 |
| Epilepsy                    | 0.97 | 2.05 | 17.34 | 107.94 | 0.85 |
| Inflammatory bowel disease  | 0.96 | 2.63 | -0.45 | 49.30  | 0.44 |
| Peripheral vascular disease | 0.88 | 0.87 | 15.21 | 60.09  | 0.53 |
| Anorexia or bulimia         | 0.55 | 0.86 | 8.54  | 36.01  | 0.34 |
| Chronic Liver Disease       | 0.53 | 1.27 | 22.22 | 77.03  | 0.72 |
| Migraine                    | 0.51 | 1.12 | -4.04 | 4.65   | 0.07 |
| Learning disability         | 0.47 | 1.15 | 10.92 | 55.75  | 0.47 |
| Bronchiectasis              | 0.43 | 2.69 | 5.65  | 84.15  | 0.66 |
| Multiple sclerosis          | 0.28 | 2.18 | 8.77  | 94.29  | 0.69 |
| Parkinson's disease         | 0.28 | 3.48 | 40.46 | 104.13 | 1.29 |

1. Negative weights can be interpreted as reflecting a negative association with the outcome of interest after controlling for other conditions; 2. Based on development dataset; 3. Per person-year; 4. Per 1,000 person-years; 5. Unit change associated a 1 SD change in each of the three outcomes
